# Supplementary material for: SARS-CoV-2 Vaccine Effectiveness in Hospitalized Patients: A Multicenter Test-Negative Case–Control Study
Source: MDPI journal article supplement (doi:10.3390/vaccines11121779), 2023-11-28
Supplement: s1 [file s1]

**Table S1.** Characteristics among controls, respiratory and non-respiratory.

|                                                   | Respiratory<br>Controls<br>(324) | Non-Respiratory<br>Controls<br>(66) | <i>p</i> |
|---------------------------------------------------|----------------------------------|-------------------------------------|----------|
| Age (years)                                       | 52±17                            | 50±19                               | 0.43     |
| Masculine gender (%)                              | 58% (189)                        | 42%(28)                             | 0.01     |
| BMI (kg/m <sup>2</sup> )                          | 27±7                             | 27±5                                | 0.95     |
| At least one comorbidity (%)                      | 74% (240)                        | 62% (41)                            | 0.27     |
| Obesity                                           | 23% (75)                         | 29% (19)                            | 0.37     |
| Diabetes                                          | 22% (72)                         | 24% (16)                            | 0.72     |
| Hypertension                                      | 32% (103)                        | 26%(17)                             | 0.33     |
| Cardiovascular disease                            | 6% (20)                          | 3% (2)                              | 0.31     |
| Current or previous tobacco<br>smoking            | 48% (157)                        | 38% (25)                            | 0.11     |
| Current tobacco smoking                           | 9% (32)                          | 6% (4)                              | 0.61     |
| Cigarettes/day                                    | 10±17                            | 2±4                                 | 0.04     |
| Biomass smoke exposure                            | 31% (101)                        | 42% (28)                            | 0.08     |
| At least one COVID-19 vaccine (%)                 | 78% (254)                        | 74% (49)                            | 0.43     |
| Full vaccination                                  | 63% (207)                        | 59% (39)                            | 0.46     |
| Incomplete vaccination                            | 14% (46)                         | 13% (9)                             | 0.90     |
| 1 dose                                            | 17% (54)                         | 21% (14)                            |          |
| 2 doses                                           | 57% (186)                        | 51% (34)                            |          |
| 3 doses                                           | 4% (14)                          | 1% (1)                              |          |
| Recent Travel                                     | 21% (69)                         | 18% (12)                            | 0.57     |
| Self-reported adherence to<br>protective measures | 74% (239)                        | 81% (54)                            | 0.54     |
| Personal risk                                     | 46% (149)                        | 39% (26)                            | 0.60     |
| In Contact with SARS CoV-2<br>positive persons    | 12% (39)                         | 7% (5)                              | 0.29     |

**Table S2.** Different COVID-19 vaccines received by the participants.

|                                                                | Cases with<br>vaccination<br>(191) | Controls with<br>vaccination<br>(301) |
|----------------------------------------------------------------|------------------------------------|---------------------------------------|
| Pfizer BNT <sub>162b2</sub><br>(Pfizer Inc./BioNTech)          | 23                                 | 65                                    |
| AstraZeneca AZD1222<br>(AstraZeneca/Universidad de<br>Oxford)  | 67                                 | 122                                   |
| Sputnik V Gam-COVID-Vac<br>(Instituto Gamaleya)                | 26                                 | 58                                    |
| CanSino Ad5-nCoV<br>(CanSino Biologics, Inc.)                  | 16                                 | 12                                    |
| SinoVac CoronaVac<br>(SinoVac Research and<br>Development Co.) | 45                                 | 27                                    |
| Moderna mRNA-1273 ModernaTX,<br>Inc.                           | 1                                  | 2                                     |
| Janssen Ad26.COV2-S<br>(Janssen-Cilag)                         | 1                                  | 1                                     |
| Does not know                                                  | 12                                 | 14                                    |
